# Supplementary material for: Genome-wide identification of TPS and TPP genes in cultivated peanut (Arachis hypogaea) and functional characterization of AhTPS9 in response to cold stress
Source: Frontiers journal article supplement (doi:10.3389/fpls.2023.1343402), 2024-01-19
Supplement: Data_Sheet_1.ZIP [file Data_Sheet_1.ZIP]

## Sheet: Cis-regulatory elements
Table S8 Cis-regulatory elements in the promoter region of peanut TPP in this study.
Transcript ID	Gene	Site Name	Sequence	Position	score	Strand Matrix	Organism	Function
arahy.Tifrunner.gnm2.ann1.0FY2NM.1	AhTPP1	TGA-element	AACGAC	247	6	-	Brassica oleracea	auxin-responsive element
arahy.Tifrunner.gnm2.ann1.0FY2NM.1	AhTPP1	G-box	CACGTC	1237	6	+	Zea mays	cis-acting regulatory element involved in light responsiveness
arahy.Tifrunner.gnm2.ann1.0FY2NM.1	AhTPP1	P-box	CCTTTTG	520	7	+	Oryza sativa	gibberellin-responsive element
arahy.Tifrunner.gnm2.ann1.0FY2NM.1	AhTPP1	chs-CMA1a	TTACTTAA	893	8	-	Daucus carota	part of a light responsive element
arahy.Tifrunner.gnm2.ann1.0FY2NM.1	AhTPP1	AE-box	AGAAACAA	536	8	-	Arabidopsis thaliana	part of a module for light response
arahy.Tifrunner.gnm2.ann1.0FY2NM.1	AhTPP1	GT1-motif	GGTTAA	314	6	-	Arabidopsis thaliana	light responsive element
arahy.Tifrunner.gnm2.ann1.0FY2NM.1	AhTPP1	GT1-motif	GGTTAAT	1221	7	+	Avena sativa	light responsive element
arahy.Tifrunner.gnm2.ann1.0FY2NM.1	AhTPP1	I-box	cCATATCCAAT	91	10	+	Flaveria trinervia	part of a light responsive element
arahy.Tifrunner.gnm2.ann1.0FY2NM.1	AhTPP1	MBS	CAACTG	234	6	-	Arabidopsis thaliana	MYB binding site involved in drought-inducibility
arahy.Tifrunner.gnm2.ann1.0FY2NM.1	AhTPP1	MBS	CAACTG	1884	6	-	Arabidopsis thaliana	MYB binding site involved in drought-inducibility
arahy.Tifrunner.gnm2.ann1.0FY2NM.1	AhTPP1	ABRE	ACGTG	1237	5	-	Arabidopsis thaliana	cis-acting element involved in the abscisic acid responsiveness
arahy.Tifrunner.gnm2.ann1.0FY2NM.1	AhTPP1	ARE	AAACCA	664	6	-	Zea mays	cis-acting regulatory element essential for the anaerobic induction
arahy.Tifrunner.gnm2.ann1.0FY2NM.1	AhTPP1	ARE	AAACCA	1147	6	-	Zea mays	cis-acting regulatory element essential for the anaerobic induction
arahy.Tifrunner.gnm2.ann1.0FY2NM.1	AhTPP1	ARE	AAACCA	1944	6	-	Zea mays	cis-acting regulatory element essential for the anaerobic induction
arahy.Tifrunner.gnm2.ann1.0FY2NM.1	AhTPP1	TCT-motif	TCTTAC	443	6	+	Arabidopsis thaliana	part of a light responsive element
arahy.Tifrunner.gnm2.ann1.51Y4LP.1	AhTPP11	AuxRR-core	GGTCCAT	638	7	+	Nicotiana tabacum	cis-acting regulatory element involved in auxin responsiveness
arahy.Tifrunner.gnm2.ann1.51Y4LP.1	AhTPP11	G-box	CACGAC	558	6	-	Zea mays	cis-acting regulatory element involved in light responsiveness
arahy.Tifrunner.gnm2.ann1.51Y4LP.1	AhTPP11	ABRE	GCAACGTGTC	580	9	-	Hordeum vulgare	cis-acting element involved in the abscisic acid responsiveness
arahy.Tifrunner.gnm2.ann1.51Y4LP.1	AhTPP11	ABRE	ACGTG	811	5	-	Arabidopsis thaliana	cis-acting element involved in the abscisic acid responsiveness
arahy.Tifrunner.gnm2.ann1.51Y4LP.1	AhTPP11	ATCT-motif	AATCTAATCC	1282	9	-	Pisum sativum	part of a conserved DNA module involved in light responsiveness
arahy.Tifrunner.gnm2.ann1.51Y4LP.1	AhTPP11	TCCC-motif	TCTCCCT	659	7	+	Spinacia oleracea	part of a light responsive element
arahy.Tifrunner.gnm2.ann1.51Y4LP.1	AhTPP11	GATA-motif	AAGATAAGATT	1005	10	-	Arabidopsis thaliana	part of a light responsive element
arahy.Tifrunner.gnm2.ann1.51Y4LP.1	AhTPP11	G-Box	CACGTT	811	6	+	Pisum sativum	cis-acting regulatory element involved in light responsiveness
arahy.Tifrunner.gnm2.ann1.51Y4LP.1	AhTPP11	Box 4	ATTAAT	526	6	+	Petroselinum crispum	part of a conserved DNA module involved in light responsiveness
arahy.Tifrunner.gnm2.ann1.51Y4LP.1	AhTPP11	Box 4	ATTAAT	1497	6	-	Petroselinum crispum	part of a conserved DNA module involved in light responsiveness
arahy.Tifrunner.gnm2.ann1.51Y4LP.1	AhTPP11	ARE	AAACCA	1841	6	+	Zea mays	cis-acting regulatory element essential for the anaerobic induction
arahy.Tifrunner.gnm2.ann1.51Y4LP.1	AhTPP11	ARE	AAACCA	1877	6	-	Zea mays	cis-acting regulatory element essential for the anaerobic induction
arahy.Tifrunner.gnm2.ann1.51Y4LP.1	AhTPP11	TCT-motif	TCTTAC	193	6	-	Arabidopsis thaliana	part of a light responsive element
arahy.Tifrunner.gnm2.ann1.51Y4LP.1	AhTPP11	MRE	AACCTAA	1115	7	-	Petroselinum crispum	MYB binding site involved in light responsiveness
arahy.Tifrunner.gnm2.ann1.5Q8BGE.1	AhTPP8	MBSI	aaaAaaC(G/C)GTTA	1080	11	+	Petunia hybrida	MYB binding site involved in flavonoid biosynthetic genes regulation
arahy.Tifrunner.gnm2.ann1.5Q8BGE.1	AhTPP8	MRE	AACCTAA	1134	7	-	Petroselinum crispum	MYB binding site involved in light responsiveness
arahy.Tifrunner.gnm2.ann1.5Q8BGE.1	AhTPP8	ARE	AAACCA	1850	6	+	Zea mays	cis-acting regulatory element essential for the anaerobic induction
arahy.Tifrunner.gnm2.ann1.5Q8BGE.1	AhTPP8	ARE	AAACCA	1886	6	-	Zea mays	cis-acting regulatory element essential for the anaerobic induction
arahy.Tifrunner.gnm2.ann1.5Q8BGE.1	AhTPP8	Box 4	ATTAAT	536	6	+	Petroselinum crispum	part of a conserved DNA module involved in light responsiveness
arahy.Tifrunner.gnm2.ann1.5Q8BGE.1	AhTPP8	Box 4	ATTAAT	1512	6	-	Petroselinum crispum	part of a conserved DNA module involved in light responsiveness
arahy.Tifrunner.gnm2.ann1.5Q8BGE.1	AhTPP8	G-Box	CACGTT	831	6	+	Pisum sativum	cis-acting regulatory element involved in light responsiveness
arahy.Tifrunner.gnm2.ann1.5Q8BGE.1	AhTPP8	GATA-motif	AAGATAAGATT	1026	10	-	Arabidopsis thaliana	part of a light responsive element
arahy.Tifrunner.gnm2.ann1.5Q8BGE.1	AhTPP8	ABRE	GCAACGTGTC	592	9	-	Hordeum vulgare	cis-acting element involved in the abscisic acid responsiveness
arahy.Tifrunner.gnm2.ann1.5Q8BGE.1	AhTPP8	ABRE	ACGTG	831	5	-	Arabidopsis thaliana	cis-acting element involved in the abscisic acid responsiveness
arahy.Tifrunner.gnm2.ann1.5Q8BGE.1	AhTPP8	G-box	CACGAC	570	6	-	Zea mays	cis-acting regulatory element involved in light responsiveness
arahy.Tifrunner.gnm2.ann1.5Q8BGE.1	AhTPP8	P-box	CCTTTTG	110	7	+	Oryza sativa	gibberellin-responsive element
arahy.Tifrunner.gnm2.ann1.5Q8BGE.1	AhTPP8	AuxRR-core	GGTCCAT	650	7	+	Nicotiana tabacum	cis-acting regulatory element involved in auxin responsiveness
arahy.Tifrunner.gnm2.ann1.8AAC5A.1	AhTPP2	TGACG-motif	TGACG	1514	5	-	Hordeum vulgare	cis-acting regulatory element involved in the MeJA-responsiveness
arahy.Tifrunner.gnm2.ann1.8AAC5A.1	AhTPP2	P-box	CCTTTTG	824	7	+	Oryza sativa	gibberellin-responsive element
arahy.Tifrunner.gnm2.ann1.8AAC5A.1	AhTPP2	CGTCA-motif	CGTCA	1514	5	+	Hordeum vulgare	cis-acting regulatory element involved in the MeJA-responsiveness
arahy.Tifrunner.gnm2.ann1.8AAC5A.1	AhTPP2	chs-CMA1a	TTACTTAA	1046	8	+	Daucus carota	part of a light responsive element
arahy.Tifrunner.gnm2.ann1.8AAC5A.1	AhTPP2	ATCT-motif	AATCTAATCC	932	9	+	Pisum sativum	part of a conserved DNA module involved in light responsiveness
arahy.Tifrunner.gnm2.ann1.8AAC5A.1	AhTPP2	Box 4	ATTAAT	216	6	+	Petroselinum crispum	part of a conserved DNA module involved in light responsiveness
arahy.Tifrunner.gnm2.ann1.8AAC5A.1	AhTPP2	Box 4	ATTAAT	395	6	+	Petroselinum crispum	part of a conserved DNA module involved in light responsiveness
arahy.Tifrunner.gnm2.ann1.8AAC5A.1	AhTPP2	Box 4	ATTAAT	417	6	+	Petroselinum crispum	part of a conserved DNA module involved in light responsiveness
arahy.Tifrunner.gnm2.ann1.8AAC5A.1	AhTPP2	Box 4	ATTAAT	441	6	+	Petroselinum crispum	part of a conserved DNA module involved in light responsiveness
arahy.Tifrunner.gnm2.ann1.8AAC5A.1	AhTPP2	Box 4	ATTAAT	481	6	+	Petroselinum crispum	part of a conserved DNA module involved in light responsiveness
arahy.Tifrunner.gnm2.ann1.8AAC5A.1	AhTPP2	Box 4	ATTAAT	1018	6	-	Petroselinum crispum	part of a conserved DNA module involved in light responsiveness
arahy.Tifrunner.gnm2.ann1.8AAC5A.1	AhTPP2	MBS	CAACTG	71	6	-	Arabidopsis thaliana	MYB binding site involved in drought-inducibility
arahy.Tifrunner.gnm2.ann1.8AAC5A.1	AhTPP2	MRE	AACCTAA	555	7	-	Petroselinum crispum	MYB binding site involved in light responsiveness
arahy.Tifrunner.gnm2.ann1.8AAC5A.1	AhTPP2	GC-motif	CCCCCG	1849	6	+	Zea mays	enhancer-like element involved in anoxic specific inducibility
arahy.Tifrunner.gnm2.ann1.B1753N.1	AhTPP12	ARE	AAACCA	1250	6	-	Zea mays	cis-acting regulatory element essential for the anaerobic induction
arahy.Tifrunner.gnm2.ann1.B1753N.1	AhTPP12	TC-rich repeats	GTTTTCTTAC	1166	9	+	Nicotiana tabacum	cis-acting element involved in defense and stress responsiveness
arahy.Tifrunner.gnm2.ann1.B1753N.1	AhTPP12	MBS	CAACTG	408	6	-	Arabidopsis thaliana	MYB binding site involved in drought-inducibility
arahy.Tifrunner.gnm2.ann1.B1753N.1	AhTPP12	MBS	CAACTG	858	6	-	Arabidopsis thaliana	MYB binding site involved in drought-inducibility
arahy.Tifrunner.gnm2.ann1.B1753N.1	AhTPP12	AT1-motif	AATTATTTTTTATT	1324	13	+	Solanum tuberosum	part of a light responsive module
arahy.Tifrunner.gnm2.ann1.B1753N.1	AhTPP12	Box 4	ATTAAT	868	6	+	Petroselinum crispum	part of a conserved DNA module involved in light responsiveness
arahy.Tifrunner.gnm2.ann1.B1753N.1	AhTPP12	Box 4	ATTAAT	1340	6	-	Petroselinum crispum	part of a conserved DNA module involved in light responsiveness
arahy.Tifrunner.gnm2.ann1.B1753N.1	AhTPP12	Box 4	ATTAAT	1858	6	-	Petroselinum crispum	part of a conserved DNA module involved in light responsiveness
arahy.Tifrunner.gnm2.ann1.B1753N.1	AhTPP12	L-box	ATCCCACCTAC	108	10	-	Petroselinum crispum	part of a light responsive element
arahy.Tifrunner.gnm2.ann1.B1753N.1	AhTPP12	ABRE	ACGTG	1960	5	-	Arabidopsis thaliana	cis-acting element involved in the abscisic acid responsiveness
arahy.Tifrunner.gnm2.ann1.B1753N.1	AhTPP12	GT1-motif	GGTTAA	958	6	+	Arabidopsis thaliana	light responsive element
arahy.Tifrunner.gnm2.ann1.B1753N.1	AhTPP12	AE-box	AGAAACTT	193	8	-	Arabidopsis thaliana	part of a module for light response
arahy.Tifrunner.gnm2.ann1.B1753N.1	AhTPP12	AE-box	AGAAACAA	1976	8	-	Arabidopsis thaliana	part of a module for light response
arahy.Tifrunner.gnm2.ann1.B1753N.1	AhTPP12	CCAAT-box	CAACGG	1973	6	-	Hordeum vulgare	MYBHv1 binding site
arahy.Tifrunner.gnm2.ann1.B1753N.1	AhTPP12	TGACG-motif	TGACG	548	5	-	Hordeum vulgare	cis-acting regulatory element involved in the MeJA-responsiveness
arahy.Tifrunner.gnm2.ann1.B1753N.1	AhTPP12	G-box	TACGTG	1960	6	-	Arabidopsis thaliana	cis-acting regulatory element involved in light responsiveness
arahy.Tifrunner.gnm2.ann1.B1753N.1	AhTPP12	P-box	CCTTTTG	57	7	-	Oryza sativa	gibberellin-responsive element
arahy.Tifrunner.gnm2.ann1.B1753N.1	AhTPP12	CGTCA-motif	CGTCA	548	5	+	Hordeum vulgare	cis-acting regulatory element involved in the MeJA-responsiveness
arahy.Tifrunner.gnm2.ann1.B2J19D.1	AhTPP15	GATA-motif	AAGGATAAGG	498	9	+	Solanum tuberosum	part of a light responsive element
arahy.Tifrunner.gnm2.ann1.B2J19D.1	AhTPP15	GATA-motif	GATAGGA	1593	7	-	Arabidopsis thaliana	part of a light responsive element
arahy.Tifrunner.gnm2.ann1.B2J19D.1	AhTPP15	Box 4	ATTAAT	53	6	+	Petroselinum crispum	part of a conserved DNA module involved in light responsiveness
arahy.Tifrunner.gnm2.ann1.B2J19D.1	AhTPP15	Box 4	ATTAAT	76	6	+	Petroselinum crispum	part of a conserved DNA module involved in light responsiveness
arahy.Tifrunner.gnm2.ann1.B2J19D.1	AhTPP15	Box 4	ATTAAT	80	6	+	Petroselinum crispum	part of a conserved DNA module involved in light responsiveness
arahy.Tifrunner.gnm2.ann1.B2J19D.1	AhTPP15	Box 4	ATTAAT	244	6	+	Petroselinum crispum	part of a conserved DNA module involved in light responsiveness
arahy.Tifrunner.gnm2.ann1.B2J19D.1	AhTPP15	Box 4	ATTAAT	248	6	+	Petroselinum crispum	part of a conserved DNA module involved in light responsiveness
arahy.Tifrunner.gnm2.ann1.B2J19D.1	AhTPP15	Box 4	ATTAAT	447	6	+	Petroselinum crispum	part of a conserved DNA module involved in light responsiveness
arahy.Tifrunner.gnm2.ann1.B2J19D.1	AhTPP15	Box 4	ATTAAT	451	6	+	Petroselinum crispum	part of a conserved DNA module involved in light responsiveness
arahy.Tifrunner.gnm2.ann1.B2J19D.1	AhTPP15	Box 4	ATTAAT	791	6	+	Petroselinum crispum	part of a conserved DNA module involved in light responsiveness
arahy.Tifrunner.gnm2.ann1.B2J19D.1	AhTPP15	Box 4	ATTAAT	1079	6	-	Petroselinum crispum	part of a conserved DNA module involved in light responsiveness
arahy.Tifrunner.gnm2.ann1.B2J19D.1	AhTPP15	ARE	AAACCA	238	6	-	Zea mays	cis-acting regulatory element essential for the anaerobic induction
arahy.Tifrunner.gnm2.ann1.B2J19D.1	AhTPP15	ARE	AAACCA	295	6	+	Zea mays	cis-acting regulatory element essential for the anaerobic induction
arahy.Tifrunner.gnm2.ann1.B2J19D.1	AhTPP15	ARE	AAACCA	516	6	-	Zea mays	cis-acting regulatory element essential for the anaerobic induction
arahy.Tifrunner.gnm2.ann1.B2J19D.1	AhTPP15	ARE	AAACCA	593	6	+	Zea mays	cis-acting regulatory element essential for the anaerobic induction
arahy.Tifrunner.gnm2.ann1.B2J19D.1	AhTPP15	ARE	AAACCA	1843	6	+	Zea mays	cis-acting regulatory element essential for the anaerobic induction
arahy.Tifrunner.gnm2.ann1.B2J19D.1	AhTPP15	TCT-motif	TCTTAC	1312	6	-	Arabidopsis thaliana	part of a light responsive element
arahy.Tifrunner.gnm2.ann1.B2J19D.1	AhTPP15	TATC-box	TATCCCA	1726	7	+	Oryza sativa	cis-acting element involved in gibberellin-responsiveness
arahy.Tifrunner.gnm2.ann1.B2J19D.1	AhTPP15	TATC-box	TATCCCA	1892	7	+	Oryza sativa	cis-acting element involved in gibberellin-responsiveness
arahy.Tifrunner.gnm2.ann1.B2J19D.1	AhTPP15	MBSI	TTTTTACGGTTA	1505	11	-	Petunia hybrida	MYB binding site involved in flavonoid biosynthetic genes regulation
arahy.Tifrunner.gnm2.ann1.B2J19D.1	AhTPP15	TGACG-motif	TGACG	1472	5	+	Hordeum vulgare	cis-acting regulatory element involved in the MeJA-responsiveness
arahy.Tifrunner.gnm2.ann1.B2J19D.1	AhTPP15	ACE	CTAACGTATT	994	9	-	Petroselinum crispum	cis-acting element involved in light responsiveness
arahy.Tifrunner.gnm2.ann1.B2J19D.1	AhTPP15	CGTCA-motif	CGTCA	1472	5	-	Hordeum vulgare	cis-acting regulatory element involved in the MeJA-responsiveness
arahy.Tifrunner.gnm2.ann1.B2J19D.1	AhTPP15	LTR	CCGAAA	856	6	-	Hordeum vulgare	cis-acting element involved in low-temperature responsiveness
arahy.Tifrunner.gnm2.ann1.B2J19D.1	AhTPP15	I-box	GATAAGGGT	501	9	+	Arabidopsis thaliana	part of a light responsive element
arahy.Tifrunner.gnm2.ann1.B2J19D.1	AhTPP15	GT1-motif	GGTTAA	764	6	+	Arabidopsis thaliana	light responsive element
arahy.Tifrunner.gnm2.ann1.B2J19D.1	AhTPP15	GT1-motif	GGTTAA	1607	6	+	Arabidopsis thaliana	light responsive element
arahy.Tifrunner.gnm2.ann1.B2J19D.1	AhTPP15	ATCT-motif	AATCTAATCC	395	9	+	Pisum sativum	part of a conserved DNA module involved in light responsiveness
arahy.Tifrunner.gnm2.ann1.B2J19D.1	AhTPP15	LAMP-element	CTTTATCA	192	8	+	Pisum sativum	part of a light responsive element
arahy.Tifrunner.gnm2.ann1.B2J19D.1	AhTPP15	LAMP-element	CCTTATCCA	499	9	-	Spinacia oleracea	part of a light responsive element
arahy.Tifrunner.gnm2.ann1.CK7SVG.1	AhTPP13	CGTCA-motif	CGTCA	451	5	+	Hordeum vulgare	cis-acting regulatory element involved in the MeJA-responsiveness
arahy.Tifrunner.gnm2.ann1.CK7SVG.1	AhTPP13	AuxRR-core	GGTCCAT	1152	7	+	Nicotiana tabacum	cis-acting regulatory element involved in auxin responsiveness
arahy.Tifrunner.gnm2.ann1.CK7SVG.1	AhTPP13	P-box	CCTTTTG	146	7	-	Oryza sativa	gibberellin-responsive element
arahy.Tifrunner.gnm2.ann1.CK7SVG.1	AhTPP13	P-box	CCTTTTG	511	7	-	Oryza sativa	gibberellin-responsive element
arahy.Tifrunner.gnm2.ann1.CK7SVG.1	AhTPP13	TCA-element	CCATCTTTTT	783	9	+	Nicotiana tabacum	cis-acting element involved in salicylic acid responsiveness
arahy.Tifrunner.gnm2.ann1.CK7SVG.1	AhTPP13	TCA-element	CCATCTTTTT	1014	9	+	Nicotiana tabacum	cis-acting element involved in salicylic acid responsiveness
arahy.Tifrunner.gnm2.ann1.CK7SVG.1	AhTPP13	TCA-element	CCATCTTTTT	1956	9	+	Nicotiana tabacum	cis-acting element involved in salicylic acid responsiveness
arahy.Tifrunner.gnm2.ann1.CK7SVG.1	AhTPP13	TGACG-motif	TGACG	451	5	-	Hordeum vulgare	cis-acting regulatory element involved in the MeJA-responsiveness
arahy.Tifrunner.gnm2.ann1.CK7SVG.1	AhTPP13	GT1-motif	GGTTAAT	892	7	+	Avena sativa	light responsive element
arahy.Tifrunner.gnm2.ann1.CK7SVG.1	AhTPP13	GT1-motif	GGTTAA	1174	6	-	Arabidopsis thaliana	light responsive element
arahy.Tifrunner.gnm2.ann1.CK7SVG.1	AhTPP13	AE-box	AGAAACTT	819	8	+	Arabidopsis thaliana	part of a module for light response
arahy.Tifrunner.gnm2.ann1.CK7SVG.1	AhTPP13	AE-box	AGAAACAA	1501	8	-	Arabidopsis thaliana	part of a module for light response
arahy.Tifrunner.gnm2.ann1.CK7SVG.1	AhTPP13	AE-box	AGAAACAA	1595	8	-	Arabidopsis thaliana	part of a module for light response
arahy.Tifrunner.gnm2.ann1.CK7SVG.1	AhTPP13	LTR	CCGAAA	36	6	-	Hordeum vulgare	cis-acting element involved in low-temperature responsiveness
arahy.Tifrunner.gnm2.ann1.CK7SVG.1	AhTPP13	LTR	CCGAAA	214	6	-	Hordeum vulgare	cis-acting element involved in low-temperature responsiveness
arahy.Tifrunner.gnm2.ann1.CK7SVG.1	AhTPP13	LTR	CCGAAA	544	6	+	Hordeum vulgare	cis-acting element involved in low-temperature responsiveness
arahy.Tifrunner.gnm2.ann1.CK7SVG.1	AhTPP13	LTR	CCGAAA	908	6	-	Hordeum vulgare	cis-acting element involved in low-temperature responsiveness
arahy.Tifrunner.gnm2.ann1.CK7SVG.1	AhTPP13	Box 4	ATTAAT	54	6	+	Petroselinum crispum	part of a conserved DNA module involved in light responsiveness
arahy.Tifrunner.gnm2.ann1.CK7SVG.1	AhTPP13	Box 4	ATTAAT	379	6	+	Petroselinum crispum	part of a conserved DNA module involved in light responsiveness
arahy.Tifrunner.gnm2.ann1.CK7SVG.1	AhTPP13	Box 4	ATTAAT	728	6	+	Petroselinum crispum	part of a conserved DNA module involved in light responsiveness
arahy.Tifrunner.gnm2.ann1.CK7SVG.1	AhTPP13	Box 4	ATTAAT	795	6	+	Petroselinum crispum	part of a conserved DNA module involved in light responsiveness
arahy.Tifrunner.gnm2.ann1.CK7SVG.1	AhTPP13	Box 4	ATTAAT	840	6	+	Petroselinum crispum	part of a conserved DNA module involved in light responsiveness
arahy.Tifrunner.gnm2.ann1.CK7SVG.1	AhTPP13	Box 4	ATTAAT	1495	6	-	Petroselinum crispum	part of a conserved DNA module involved in light responsiveness
arahy.Tifrunner.gnm2.ann1.CK7SVG.1	AhTPP13	GC-motif	CCCCCG	217	6	-	Zea mays	enhancer-like element involved in anoxic specific inducibility
arahy.Tifrunner.gnm2.ann1.CK7SVG.1	AhTPP13	ARE	AAACCA	33	6	-	Zea mays	cis-acting regulatory element essential for the anaerobic induction
arahy.Tifrunner.gnm2.ann1.CK7SVG.1	AhTPP13	ARE	AAACCA	200	6	-	Zea mays	cis-acting regulatory element essential for the anaerobic induction
arahy.Tifrunner.gnm2.ann1.CK7SVG.1	AhTPP13	ARE	AAACCA	856	6	+	Zea mays	cis-acting regulatory element essential for the anaerobic induction
arahy.Tifrunner.gnm2.ann1.CK7SVG.1	AhTPP13	ARE	AAACCA	1721	6	+	Zea mays	cis-acting regulatory element essential for the anaerobic induction
arahy.Tifrunner.gnm2.ann1.CK7SVG.1	AhTPP13	TC-rich repeats	GTTTTCTTAC	1432	9	+	Nicotiana tabacum	cis-acting element involved in defense and stress responsiveness
arahy.Tifrunner.gnm2.ann1.DP0G5T.1	AhTPP9	ABRE	CACGTG	1440	6	-	Arabidopsis thaliana	cis-acting element involved in the abscisic acid responsiveness
arahy.Tifrunner.gnm2.ann1.DP0G5T.1	AhTPP9	ABRE	ACGTG	1441	5	+	Arabidopsis thaliana	cis-acting element involved in the abscisic acid responsiveness
arahy.Tifrunner.gnm2.ann1.DP0G5T.1	AhTPP9	LTR	CCGAAA	1193	6	-	Hordeum vulgare	cis-acting element involved in low-temperature responsiveness
arahy.Tifrunner.gnm2.ann1.DP0G5T.1	AhTPP9	GT1-motif	GGTTAAT	786	7	+	Avena sativa	light responsive element
arahy.Tifrunner.gnm2.ann1.DP0G5T.1	AhTPP9	GT1-motif	GGTTAA	1110	6	-	Arabidopsis thaliana	light responsive element
arahy.Tifrunner.gnm2.ann1.DP0G5T.1	AhTPP9	GT1-motif	GGTTAA	1167	6	+	Arabidopsis thaliana	light responsive element
arahy.Tifrunner.gnm2.ann1.DP0G5T.1	AhTPP9	CCAAT-box	CAACGG	1114	6	-	Hordeum vulgare	MYBHv1 binding site
arahy.Tifrunner.gnm2.ann1.DP0G5T.1	AhTPP9	CCAAT-box	CAACGG	1163	6	+	Hordeum vulgare	MYBHv1 binding site
arahy.Tifrunner.gnm2.ann1.DP0G5T.1	AhTPP9	CCAAT-box	CAACGG	1725	6	+	Hordeum vulgare	MYBHv1 binding site
arahy.Tifrunner.gnm2.ann1.DP0G5T.1	AhTPP9	G-box	CACGTG	1440	6	-	Arabidopsis thaliana	cis-acting regulatory element involved in light responsiveness
arahy.Tifrunner.gnm2.ann1.DP0G5T.1	AhTPP9	P-box	CCTTTTG	863	7	-	Oryza sativa	gibberellin-responsive element
arahy.Tifrunner.gnm2.ann1.DP0G5T.1	AhTPP9	P-box	CCTTTTG	1829	7	+	Oryza sativa	gibberellin-responsive element
arahy.Tifrunner.gnm2.ann1.DP0G5T.1	AhTPP9	TCT-motif	TCTTAC	1842	6	+	Arabidopsis thaliana	part of a light responsive element
arahy.Tifrunner.gnm2.ann1.DP0G5T.1	AhTPP9	ARE	AAACCA	808	6	+	Zea mays	cis-acting regulatory element essential for the anaerobic induction
arahy.Tifrunner.gnm2.ann1.DP0G5T.1	AhTPP9	ARE	AAACCA	1861	6	+	Zea mays	cis-acting regulatory element essential for the anaerobic induction
arahy.Tifrunner.gnm2.ann1.DP0G5T.1	AhTPP9	TC-rich repeats	GTTTTCTTAC	30	9	+	Nicotiana tabacum	cis-acting element involved in defense and stress responsiveness
arahy.Tifrunner.gnm2.ann1.DP0G5T.1	AhTPP9	MBS	CAACTG	1709	6	-	Arabidopsis thaliana	MYB binding site involved in drought-inducibility
arahy.Tifrunner.gnm2.ann1.DP0G5T.1	AhTPP9	MBSI	aaaAaaC(G/C)GTTA	199	11	-	Petunia hybrida	MYB binding site involved in flavonoid biosynthetic genes regulation
arahy.Tifrunner.gnm2.ann1.DP0G5T.1	AhTPP9	MBSI	aaaAaaC(G/C)GTTA	342	11	+	Petunia hybrida	MYB binding site involved in flavonoid biosynthetic genes regulation
arahy.Tifrunner.gnm2.ann1.DP0G5T.1	AhTPP9	GATA-motif	AAGGATAAGG	1417	9	+	Solanum tuberosum	part of a light responsive element
arahy.Tifrunner.gnm2.ann1.DP0G5T.1	AhTPP9	G-Box	CACGTG	1440	6	-	Pisum sativum	cis-acting regulatory element involved in light responsiveness
arahy.Tifrunner.gnm2.ann1.DP0G5T.1	AhTPP9	AT1-motif	AATTATTTTTTATT	1290	13	-	Solanum tuberosum	part of a light responsive module
arahy.Tifrunner.gnm2.ann1.DP0G5T.1	AhTPP9	Box 4	ATTAAT	146	6	+	Petroselinum crispum	part of a conserved DNA module involved in light responsiveness
arahy.Tifrunner.gnm2.ann1.DP0G5T.1	AhTPP9	Box 4	ATTAAT	189	6	+	Petroselinum crispum	part of a conserved DNA module involved in light responsiveness
arahy.Tifrunner.gnm2.ann1.DP0G5T.1	AhTPP9	Box 4	ATTAAT	959	6	+	Petroselinum crispum	part of a conserved DNA module involved in light responsiveness
arahy.Tifrunner.gnm2.ann1.DP0G5T.1	AhTPP9	Box 4	ATTAAT	1126	6	-	Petroselinum crispum	part of a conserved DNA module involved in light responsiveness
arahy.Tifrunner.gnm2.ann1.DP0G5T.1	AhTPP9	Box 4	ATTAAT	1279	6	-	Petroselinum crispum	part of a conserved DNA module involved in light responsiveness
arahy.Tifrunner.gnm2.ann1.DP0G5T.1	AhTPP9	Box 4	ATTAAT	1639	6	-	Petroselinum crispum	part of a conserved DNA module involved in light responsiveness
arahy.Tifrunner.gnm2.ann1.FIK9JS.1	AhTPP6	GA-motif	ATAGATAA	1928	8	+	Arabidopsis thaliana	part of a light responsive element
arahy.Tifrunner.gnm2.ann1.FIK9JS.1	AhTPP6	Box 4	ATTAAT	340	6	+	Petroselinum crispum	part of a conserved DNA module involved in light responsiveness
arahy.Tifrunner.gnm2.ann1.FIK9JS.1	AhTPP6	Box 4	ATTAAT	1244	6	-	Petroselinum crispum	part of a conserved DNA module involved in light responsiveness
arahy.Tifrunner.gnm2.ann1.FIK9JS.1	AhTPP6	chs-CMA2a	TCACTTGA	1771	8	+	Petroselinum crispum	part of a light responsive element
arahy.Tifrunner.gnm2.ann1.FIK9JS.1	AhTPP6	G-Box	CACGTGAAA	1557	9	-	Pisum sativum	cis-acting regulatory element involved in light responsiveness
arahy.Tifrunner.gnm2.ann1.FIK9JS.1	AhTPP6	G-Box	CACGTG	1560	6	-	Pisum sativum	cis-acting regulatory element involved in light responsiveness
arahy.Tifrunner.gnm2.ann1.FIK9JS.1	AhTPP6	GATA-motif	AAGATAAGATT	1864	10	+	Arabidopsis thaliana	part of a light responsive element
arahy.Tifrunner.gnm2.ann1.FIK9JS.1	AhTPP6	MBS	CAACTG	1831	6	-	Arabidopsis thaliana	MYB binding site involved in drought-inducibility
arahy.Tifrunner.gnm2.ann1.FIK9JS.1	AhTPP6	ARE	AAACCA	566	6	+	Zea mays	cis-acting regulatory element essential for the anaerobic induction
arahy.Tifrunner.gnm2.ann1.FIK9JS.1	AhTPP6	ARE	AAACCA	1882	6	-	Zea mays	cis-acting regulatory element essential for the anaerobic induction
arahy.Tifrunner.gnm2.ann1.FIK9JS.1	AhTPP6	TC-rich repeats	GTTTTCTTAC	277	9	+	Nicotiana tabacum	cis-acting element involved in defense and stress responsiveness
arahy.Tifrunner.gnm2.ann1.FIK9JS.1	AhTPP6	CGTCA-motif	CGTCA	1299	5	+	Hordeum vulgare	cis-acting regulatory element involved in the MeJA-responsiveness
arahy.Tifrunner.gnm2.ann1.FIK9JS.1	AhTPP6	CGTCA-motif	CGTCA	1986	5	+	Hordeum vulgare	cis-acting regulatory element involved in the MeJA-responsiveness
arahy.Tifrunner.gnm2.ann1.FIK9JS.1	AhTPP6	G-box	CACGTG	1560	6	-	Arabidopsis thaliana	cis-acting regulatory element involved in light responsiveness
arahy.Tifrunner.gnm2.ann1.FIK9JS.1	AhTPP6	AuxRR-core	GGTCCAT	20	7	+	Nicotiana tabacum	cis-acting regulatory element involved in auxin responsiveness
arahy.Tifrunner.gnm2.ann1.FIK9JS.1	AhTPP6	TCA-element	CCATCTTTTT	801	9	+	Nicotiana tabacum	cis-acting element involved in salicylic acid responsiveness
arahy.Tifrunner.gnm2.ann1.FIK9JS.1	AhTPP6	TGACG-motif	TGACG	1299	5	-	Hordeum vulgare	cis-acting regulatory element involved in the MeJA-responsiveness
arahy.Tifrunner.gnm2.ann1.FIK9JS.1	AhTPP6	TGACG-motif	TGACG	1986	5	-	Hordeum vulgare	cis-acting regulatory element involved in the MeJA-responsiveness
arahy.Tifrunner.gnm2.ann1.FIK9JS.1	AhTPP6	AE-box	AGAAACAA	346	8	-	Arabidopsis thaliana	part of a module for light response
arahy.Tifrunner.gnm2.ann1.FIK9JS.1	AhTPP6	AE-box	AGAAACTT	542	8	-	Arabidopsis thaliana	part of a module for light response
arahy.Tifrunner.gnm2.ann1.FIK9JS.1	AhTPP6	ABRE	CACGTG	1560	6	-	Arabidopsis thaliana	cis-acting element involved in the abscisic acid responsiveness
arahy.Tifrunner.gnm2.ann1.FIK9JS.1	AhTPP6	ABRE	ACGTG	1561	5	+	Arabidopsis thaliana	cis-acting element involved in the abscisic acid responsiveness
arahy.Tifrunner.gnm2.ann1.FJ2B1F.1	AhTPP17	ABRE	ACGTG	1111	5	-	Arabidopsis thaliana	cis-acting element involved in the abscisic acid responsiveness
arahy.Tifrunner.gnm2.ann1.FJ2B1F.1	AhTPP17	LTR	CCGAAA	1884	6	-	Hordeum vulgare	cis-acting element involved in low-temperature responsiveness
arahy.Tifrunner.gnm2.ann1.FJ2B1F.1	AhTPP17	GT1-motif	GGTTAA	358	6	+	Arabidopsis thaliana	light responsive element
arahy.Tifrunner.gnm2.ann1.FJ2B1F.1	AhTPP17	GT1-motif	GGTTAAT	620	7	-	Avena sativa	light responsive element
arahy.Tifrunner.gnm2.ann1.FJ2B1F.1	AhTPP17	GT1-motif	GGTTAA	621	6	-	Arabidopsis thaliana	light responsive element
arahy.Tifrunner.gnm2.ann1.FJ2B1F.1	AhTPP17	GT1-motif	GGTTAA	967	6	+	Arabidopsis thaliana	light responsive element
arahy.Tifrunner.gnm2.ann1.FJ2B1F.1	AhTPP17	I-box	atGATAAGGTC	22	10	-	Helianthus annuus	part of a light responsive element
arahy.Tifrunner.gnm2.ann1.FJ2B1F.1	AhTPP17	I-box	gGATAAGGTG	1147	9	+	Zea mays	part of a light responsive element
arahy.Tifrunner.gnm2.ann1.FJ2B1F.1	AhTPP17	CCAAT-box	CAACGG	864	6	+	Hordeum vulgare	MYBHv1 binding site
arahy.Tifrunner.gnm2.ann1.FJ2B1F.1	AhTPP17	TGACG-motif	TGACG	1217	5	+	Hordeum vulgare	cis-acting regulatory element involved in the MeJA-responsiveness
arahy.Tifrunner.gnm2.ann1.FJ2B1F.1	AhTPP17	TGACG-motif	TGACG	1307	5	+	Hordeum vulgare	cis-acting regulatory element involved in the MeJA-responsiveness
arahy.Tifrunner.gnm2.ann1.FJ2B1F.1	AhTPP17	TGACG-motif	TGACG	1499	5	+	Hordeum vulgare	cis-acting regulatory element involved in the MeJA-responsiveness
arahy.Tifrunner.gnm2.ann1.FJ2B1F.1	AhTPP17	G-box	TACGTG	1111	6	-	Arabidopsis thaliana	cis-acting regulatory element involved in light responsiveness
arahy.Tifrunner.gnm2.ann1.FJ2B1F.1	AhTPP17	CGTCA-motif	CGTCA	1217	5	-	Hordeum vulgare	cis-acting regulatory element involved in the MeJA-responsiveness
arahy.Tifrunner.gnm2.ann1.FJ2B1F.1	AhTPP17	CGTCA-motif	CGTCA	1307	5	-	Hordeum vulgare	cis-acting regulatory element involved in the MeJA-responsiveness
arahy.Tifrunner.gnm2.ann1.FJ2B1F.1	AhTPP17	CGTCA-motif	CGTCA	1499	5	-	Hordeum vulgare	cis-acting regulatory element involved in the MeJA-responsiveness
arahy.Tifrunner.gnm2.ann1.FJ2B1F.1	AhTPP17	ARE	AAACCA	100	6	+	Zea mays	cis-acting regulatory element essential for the anaerobic induction
arahy.Tifrunner.gnm2.ann1.FJ2B1F.1	AhTPP17	TCT-motif	TCTTAC	1824	6	-	Arabidopsis thaliana	part of a light responsive element
arahy.Tifrunner.gnm2.ann1.FJ2B1F.1	AhTPP17	TCCC-motif	TCTCCCT	1236	7	-	Spinacia oleracea	part of a light responsive element
arahy.Tifrunner.gnm2.ann1.FJ2B1F.1	AhTPP17	Box 4	ATTAAT	1529	6	-	Petroselinum crispum	part of a conserved DNA module involved in light responsiveness
arahy.Tifrunner.gnm2.ann1.FJ2B1F.1	AhTPP17	TGA-element	AACGAC	557	6	-	Brassica oleracea	auxin-responsive element
arahy.Tifrunner.gnm2.ann1.G2WE73.1	AhTPP5	P-box	CCTTTTG	345	7	+	Oryza sativa	gibberellin-responsive element
arahy.Tifrunner.gnm2.ann1.G2WE73.1	AhTPP5	CGTCA-motif	CGTCA	1195	5	+	Hordeum vulgare	cis-acting regulatory element involved in the MeJA-responsiveness
arahy.Tifrunner.gnm2.ann1.G2WE73.1	AhTPP5	TGACG-motif	TGACG	1195	5	-	Hordeum vulgare	cis-acting regulatory element involved in the MeJA-responsiveness
arahy.Tifrunner.gnm2.ann1.G2WE73.1	AhTPP5	TCA-element	CCATCTTTTT	1396	9	-	Nicotiana tabacum	cis-acting element involved in salicylic acid responsiveness
arahy.Tifrunner.gnm2.ann1.G2WE73.1	AhTPP5	AE-box	AGAAACAA	361	8	-	Arabidopsis thaliana	part of a module for light response
arahy.Tifrunner.gnm2.ann1.G2WE73.1	AhTPP5	GT1-motif	GGTTAAT	972	7	+	Avena sativa	light responsive element
arahy.Tifrunner.gnm2.ann1.G2WE73.1	AhTPP5	GT1-motif	GGTTAAT	1131	7	+	Avena sativa	light responsive element
arahy.Tifrunner.gnm2.ann1.G2WE73.1	AhTPP5	ABRE	ACGTG	677	5	-	Arabidopsis thaliana	cis-acting element involved in the abscisic acid responsiveness
arahy.Tifrunner.gnm2.ann1.G2WE73.1	AhTPP5	chs-CMA2a	TCACTTGA	1537	8	+	Petroselinum crispum	part of a light responsive element
arahy.Tifrunner.gnm2.ann1.G2WE73.1	AhTPP5	Box 4	ATTAAT	1647	6	-	Petroselinum crispum	part of a conserved DNA module involved in light responsiveness
arahy.Tifrunner.gnm2.ann1.G2WE73.1	AhTPP5	Box 4	ATTAAT	1810	6	-	Petroselinum crispum	part of a conserved DNA module involved in light responsiveness
arahy.Tifrunner.gnm2.ann1.G2WE73.1	AhTPP5	TGA-element	AACGAC	57	6	-	Brassica oleracea	auxin-responsive element
arahy.Tifrunner.gnm2.ann1.G2WE73.1	AhTPP5	G-Box	CACGTT	677	6	+	Pisum sativum	cis-acting regulatory element involved in light responsiveness
arahy.Tifrunner.gnm2.ann1.G2WE73.1	AhTPP5	MRE	AACCTAA	481	7	-	Petroselinum crispum	MYB binding site involved in light responsiveness
arahy.Tifrunner.gnm2.ann1.G2WE73.1	AhTPP5	ARE	AAACCA	489	6	-	Zea mays	cis-acting regulatory element essential for the anaerobic induction
arahy.Tifrunner.gnm2.ann1.G2WE73.1	AhTPP5	TCT-motif	TCTTAC	268	6	+	Arabidopsis thaliana	part of a light responsive element
arahy.Tifrunner.gnm2.ann1.G2WE73.1	AhTPP5	MBS	CAACTG	44	6	-	Arabidopsis thaliana	MYB binding site involved in drought-inducibility
arahy.Tifrunner.gnm2.ann1.G2WE73.1	AhTPP5	MBS	CAACTG	1884	6	-	Arabidopsis thaliana	MYB binding site involved in drought-inducibility
arahy.Tifrunner.gnm2.ann1.J3QXZL.1	AhTPP14	P-box	CCTTTTG	934	7	-	Oryza sativa	gibberellin-responsive element
arahy.Tifrunner.gnm2.ann1.J3QXZL.1	AhTPP14	P-box	CCTTTTG	1720	7	+	Oryza sativa	gibberellin-responsive element
arahy.Tifrunner.gnm2.ann1.J3QXZL.1	AhTPP14	G-box	CACGTG	1330	6	-	Arabidopsis thaliana	cis-acting regulatory element involved in light responsiveness
arahy.Tifrunner.gnm2.ann1.J3QXZL.1	AhTPP14	LTR	CCGAAA	1984	6	-	Hordeum vulgare	cis-acting element involved in low-temperature responsiveness
arahy.Tifrunner.gnm2.ann1.J3QXZL.1	AhTPP14	ABRE	CACGTG	1330	6	-	Arabidopsis thaliana	cis-acting element involved in the abscisic acid responsiveness
arahy.Tifrunner.gnm2.ann1.J3QXZL.1	AhTPP14	ABRE	ACGTG	1331	5	+	Arabidopsis thaliana	cis-acting element involved in the abscisic acid responsiveness
arahy.Tifrunner.gnm2.ann1.J3QXZL.1	AhTPP14	CCAAT-box	CAACGG	1617	6	+	Hordeum vulgare	MYBHv1 binding site
arahy.Tifrunner.gnm2.ann1.J3QXZL.1	AhTPP14	GT1-motif	GGTTAAT	857	7	+	Avena sativa	light responsive element
arahy.Tifrunner.gnm2.ann1.J3QXZL.1	AhTPP14	G-Box	CACGTG	1330	6	-	Pisum sativum	cis-acting regulatory element involved in light responsiveness
arahy.Tifrunner.gnm2.ann1.J3QXZL.1	AhTPP14	GATA-motif	GATAGGA	832	7	+	Arabidopsis thaliana	part of a light responsive element
arahy.Tifrunner.gnm2.ann1.J3QXZL.1	AhTPP14	TGA-element	AACGAC	1964	6	-	Brassica oleracea	auxin-responsive element
arahy.Tifrunner.gnm2.ann1.J3QXZL.1	AhTPP14	Box 4	ATTAAT	220	6	+	Petroselinum crispum	part of a conserved DNA module involved in light responsiveness
arahy.Tifrunner.gnm2.ann1.J3QXZL.1	AhTPP14	Box 4	ATTAAT	286	6	+	Petroselinum crispum	part of a conserved DNA module involved in light responsiveness
arahy.Tifrunner.gnm2.ann1.J3QXZL.1	AhTPP14	Box 4	ATTAAT	427	6	+	Petroselinum crispum	part of a conserved DNA module involved in light responsiveness
arahy.Tifrunner.gnm2.ann1.J3QXZL.1	AhTPP14	Box 4	ATTAAT	1531	6	-	Petroselinum crispum	part of a conserved DNA module involved in light responsiveness
arahy.Tifrunner.gnm2.ann1.J3QXZL.1	AhTPP14	Box 4	ATTAAT	1914	6	-	Petroselinum crispum	part of a conserved DNA module involved in light responsiveness
arahy.Tifrunner.gnm2.ann1.J3QXZL.1	AhTPP14	MBS	CAACTG	1601	6	-	Arabidopsis thaliana	MYB binding site involved in drought-inducibility
arahy.Tifrunner.gnm2.ann1.J3QXZL.1	AhTPP14	TCT-motif	TCTTAC	1733	6	+	Arabidopsis thaliana	part of a light responsive element
arahy.Tifrunner.gnm2.ann1.J3QXZL.1	AhTPP14	ARE	AAACCA	1497	6	-	Zea mays	cis-acting regulatory element essential for the anaerobic induction
arahy.Tifrunner.gnm2.ann1.J3QXZL.1	AhTPP14	ARE	AAACCA	1752	6	+	Zea mays	cis-acting regulatory element essential for the anaerobic induction
arahy.Tifrunner.gnm2.ann1.J3QXZL.1	AhTPP14	MBSI	aaaAaaC(G/C)GTTA	440	11	+	Petunia hybrida	MYB binding site involved in flavonoid biosynthetic genes regulation
arahy.Tifrunner.gnm2.ann1.KW1U5A.1	AhTPP3	Box 4	ATTAAT	1048	6	-	Petroselinum crispum	part of a conserved DNA module involved in light responsiveness
arahy.Tifrunner.gnm2.ann1.KW1U5A.1	AhTPP3	Box 4	ATTAAT	1052	6	-	Petroselinum crispum	part of a conserved DNA module involved in light responsiveness
arahy.Tifrunner.gnm2.ann1.KW1U5A.1	AhTPP3	Box 4	ATTAAT	1069	6	-	Petroselinum crispum	part of a conserved DNA module involved in light responsiveness
arahy.Tifrunner.gnm2.ann1.KW1U5A.1	AhTPP3	Box 4	ATTAAT	1281	6	-	Petroselinum crispum	part of a conserved DNA module involved in light responsiveness
arahy.Tifrunner.gnm2.ann1.KW1U5A.1	AhTPP3	Box 4	ATTAAT	1353	6	-	Petroselinum crispum	part of a conserved DNA module involved in light responsiveness
arahy.Tifrunner.gnm2.ann1.KW1U5A.1	AhTPP3	Box 4	ATTAAT	1860	6	-	Petroselinum crispum	part of a conserved DNA module involved in light responsiveness
arahy.Tifrunner.gnm2.ann1.KW1U5A.1	AhTPP3	Box 4	ATTAAT	1872	6	-	Petroselinum crispum	part of a conserved DNA module involved in light responsiveness
arahy.Tifrunner.gnm2.ann1.KW1U5A.1	AhTPP3	GARE-motif	TCTGTTG	1976	7	+	Brassica oleracea	gibberellin-responsive element
arahy.Tifrunner.gnm2.ann1.KW1U5A.1	AhTPP3	ARE	AAACCA	1634	6	+	Zea mays	cis-acting regulatory element essential for the anaerobic induction
arahy.Tifrunner.gnm2.ann1.KW1U5A.1	AhTPP3	G-box	TACGTG	1964	6	-	Arabidopsis thaliana	cis-acting regulatory element involved in light responsiveness
arahy.Tifrunner.gnm2.ann1.KW1U5A.1	AhTPP3	TCA-element	TCAGAAGAGG	147	9	-	Brassica oleracea	cis-acting element involved in salicylic acid responsiveness
arahy.Tifrunner.gnm2.ann1.KW1U5A.1	AhTPP3	AE-box	AGAAACAA	1980	8	-	Arabidopsis thaliana	part of a module for light response
arahy.Tifrunner.gnm2.ann1.KW1U5A.1	AhTPP3	ABRE	ACGTG	1964	5	-	Arabidopsis thaliana	cis-acting element involved in the abscisic acid responsiveness
arahy.Tifrunner.gnm2.ann1.P5P8C7.1	AhTPP7	GT1-motif	GGTTAAT	103	7	-	Avena sativa	light responsive element
arahy.Tifrunner.gnm2.ann1.P5P8C7.1	AhTPP7	GT1-motif	GGTTAA	104	6	-	Arabidopsis thaliana	light responsive element
arahy.Tifrunner.gnm2.ann1.P5P8C7.1	AhTPP7	GT1-motif	GGTTAA	303	6	-	Arabidopsis thaliana	light responsive element
arahy.Tifrunner.gnm2.ann1.P5P8C7.1	AhTPP7	GT1-motif	GGTTAAT	581	7	-	Avena sativa	light responsive element
arahy.Tifrunner.gnm2.ann1.P5P8C7.1	AhTPP7	GT1-motif	GGTTAA	582	6	-	Arabidopsis thaliana	light responsive element
arahy.Tifrunner.gnm2.ann1.P5P8C7.1	AhTPP7	GT1-motif	GGTTAA	1571	6	-	Arabidopsis thaliana	light responsive element
arahy.Tifrunner.gnm2.ann1.P5P8C7.1	AhTPP7	I-box	gGATAAGGTG	1124	9	+	Zea mays	part of a light responsive element
arahy.Tifrunner.gnm2.ann1.P5P8C7.1	AhTPP7	ATCT-motif	AATCTAATCC	641	9	+	Pisum sativum	part of a conserved DNA module involved in light responsiveness
arahy.Tifrunner.gnm2.ann1.P5P8C7.1	AhTPP7	ABRE	ACGTG	1088	5	-	Arabidopsis thaliana	cis-acting element involved in the abscisic acid responsiveness
arahy.Tifrunner.gnm2.ann1.P5P8C7.1	AhTPP7	ABRE	ACGTG	1474	5	+	Arabidopsis thaliana	cis-acting element involved in the abscisic acid responsiveness
arahy.Tifrunner.gnm2.ann1.P5P8C7.1	AhTPP7	LTR	CCGAAA	1919	6	-	Hordeum vulgare	cis-acting element involved in low-temperature responsiveness
arahy.Tifrunner.gnm2.ann1.P5P8C7.1	AhTPP7	G-box	CACGAC	1407	6	-	Zea mays	cis-acting regulatory element involved in light responsiveness
arahy.Tifrunner.gnm2.ann1.P5P8C7.1	AhTPP7	CGTCA-motif	CGTCA	1093	5	-	Hordeum vulgare	cis-acting regulatory element involved in the MeJA-responsiveness
arahy.Tifrunner.gnm2.ann1.P5P8C7.1	AhTPP7	CGTCA-motif	CGTCA	1361	5	-	Hordeum vulgare	cis-acting regulatory element involved in the MeJA-responsiveness
arahy.Tifrunner.gnm2.ann1.P5P8C7.1	AhTPP7	ACE	GCGACGTACC	1196	9	+	Petroselinum crispum	cis-acting element involved in light responsiveness
arahy.Tifrunner.gnm2.ann1.P5P8C7.1	AhTPP7	TGACG-motif	TGACG	1093	5	+	Hordeum vulgare	cis-acting regulatory element involved in the MeJA-responsiveness
arahy.Tifrunner.gnm2.ann1.P5P8C7.1	AhTPP7	TGACG-motif	TGACG	1361	5	+	Hordeum vulgare	cis-acting regulatory element involved in the MeJA-responsiveness
arahy.Tifrunner.gnm2.ann1.P5P8C7.1	AhTPP7	MBSI	aaaAaaC(G/C)GTTA	1572	10.5	-	Petunia hybrida	MYB binding site involved in flavonoid biosynthetic genes regulation
arahy.Tifrunner.gnm2.ann1.P5P8C7.1	AhTPP7	TCT-motif	TCTTAC	1859	6	-	Arabidopsis thaliana	part of a light responsive element
arahy.Tifrunner.gnm2.ann1.P5P8C7.1	AhTPP7	MBS	CAACTG	840	6	-	Arabidopsis thaliana	MYB binding site involved in drought-inducibility
arahy.Tifrunner.gnm2.ann1.P5P8C7.1	AhTPP7	Box 4	ATTAAT	485	6	+	Petroselinum crispum	part of a conserved DNA module involved in light responsiveness
arahy.Tifrunner.gnm2.ann1.P5P8C7.1	AhTPP7	Box 4	ATTAAT	1526	6	-	Petroselinum crispum	part of a conserved DNA module involved in light responsiveness
arahy.Tifrunner.gnm2.ann1.P5P8C7.1	AhTPP7	GARE-motif	TCTGTTG	322	7	+	Brassica oleracea	gibberellin-responsive element
arahy.Tifrunner.gnm2.ann1.P5P8C7.1	AhTPP7	GARE-motif	TCTGTTG	406	7	+	Brassica oleracea	gibberellin-responsive element
arahy.Tifrunner.gnm2.ann1.P5P8C7.1	AhTPP7	TGA-element	AACGAC	518	6	-	Brassica oleracea	auxin-responsive element
arahy.Tifrunner.gnm2.ann1.P5P8C7.1	AhTPP7	G-Box	CACGTT	1088	6	+	Pisum sativum	cis-acting regulatory element involved in light responsiveness
arahy.Tifrunner.gnm2.ann1.P5P8C7.1	AhTPP7	G-Box	CACGTT	1473	6	-	Pisum sativum	cis-acting regulatory element involved in light responsiveness
arahy.Tifrunner.gnm2.ann1.P5P8C7.1	AhTPP7	GATA-motif	GATAGGG	902	7	-	Pisum sativum	part of a light responsive element
arahy.Tifrunner.gnm2.ann1.P5P8C7.1	AhTPP7	TCCC-motif	TCTCCCT	1168	7	-	Spinacia oleracea	part of a light responsive element
arahy.Tifrunner.gnm2.ann1.P5P8C7.1	AhTPP7	TCCC-motif	TCTCCCT	1216	7	-	Spinacia oleracea	part of a light responsive element
arahy.Tifrunner.gnm2.ann1.S15BQI.1	AhTPP10	ATCT-motif	AATCTAATCC	910	9	-	Pisum sativum	part of a conserved DNA module involved in light responsiveness
arahy.Tifrunner.gnm2.ann1.S15BQI.1	AhTPP10	ATCT-motif	AATCTAATCC	1359	10	-	Pisum sativum	part of a conserved DNA module involved in light responsiveness
arahy.Tifrunner.gnm2.ann1.S15BQI.1	AhTPP10	ABRE	ACGTG	1641	5	-	Arabidopsis thaliana	cis-acting element involved in the abscisic acid responsiveness
arahy.Tifrunner.gnm2.ann1.S15BQI.1	AhTPP10	P-box	CCTTTTG	1087	7	-	Oryza sativa	gibberellin-responsive element
arahy.Tifrunner.gnm2.ann1.S15BQI.1	AhTPP10	G-box	TAACACGTAG	1459	9	-	Brassica oleracea	cis-acting regulatory element involved in light responsiveness
arahy.Tifrunner.gnm2.ann1.S15BQI.1	AhTPP10	TCA-element	CCATCTTTTT	824	9	+	Nicotiana tabacum	cis-acting element involved in salicylic acid responsiveness
arahy.Tifrunner.gnm2.ann1.S15BQI.1	AhTPP10	ARE	AAACCA	1066	6	-	Zea mays	cis-acting regulatory element essential for the anaerobic induction
arahy.Tifrunner.gnm2.ann1.S15BQI.1	AhTPP10	ARE	AAACCA	1205	6	-	Zea mays	cis-acting regulatory element essential for the anaerobic induction
arahy.Tifrunner.gnm2.ann1.S15BQI.1	AhTPP10	Box 4	ATTAAT	529	6	+	Petroselinum crispum	part of a conserved DNA module involved in light responsiveness
arahy.Tifrunner.gnm2.ann1.S15BQI.1	AhTPP10	Box 4	ATTAAT	607	6	+	Petroselinum crispum	part of a conserved DNA module involved in light responsiveness
arahy.Tifrunner.gnm2.ann1.S15BQI.1	AhTPP10	Box 4	ATTAAT	702	6	+	Petroselinum crispum	part of a conserved DNA module involved in light responsiveness
arahy.Tifrunner.gnm2.ann1.S15BQI.1	AhTPP10	Box 4	ATTAAT	938	6	+	Petroselinum crispum	part of a conserved DNA module involved in light responsiveness
arahy.Tifrunner.gnm2.ann1.S15BQI.1	AhTPP10	Box 4	ATTAAT	946	6	+	Petroselinum crispum	part of a conserved DNA module involved in light responsiveness
arahy.Tifrunner.gnm2.ann1.S15BQI.1	AhTPP10	Box 4	ATTAAT	1314	6	-	Petroselinum crispum	part of a conserved DNA module involved in light responsiveness
arahy.Tifrunner.gnm2.ann1.S15BQI.1	AhTPP10	Box 4	ATTAAT	1366	6	-	Petroselinum crispum	part of a conserved DNA module involved in light responsiveness
arahy.Tifrunner.gnm2.ann1.S15BQI.1	AhTPP10	Box 4	ATTAAT	1465	6	-	Petroselinum crispum	part of a conserved DNA module involved in light responsiveness
arahy.Tifrunner.gnm2.ann1.S15BQI.1	AhTPP10	GARE-motif	TCTGTTG	627	7	-	Brassica oleracea	gibberellin-responsive element
arahy.Tifrunner.gnm2.ann1.S15BQI.1	AhTPP10	G-Box	CACGTT	1641	6	+	Pisum sativum	cis-acting regulatory element involved in light responsiveness
arahy.Tifrunner.gnm2.ann1.S15BQI.1	AhTPP10	AT1-motif	AATTATTTTTTATT	511	13	-	Solanum tuberosum	part of a light responsive module
arahy.Tifrunner.gnm2.ann1.S15BQI.1	AhTPP10	TCCC-motif	TCTCCCT	1723	7	+	Spinacia oleracea	part of a light responsive element
arahy.Tifrunner.gnm2.ann1.SS1VDK.1	AhTPP4	ATCT-motif	AATCTAATCC	903	9	-	Pisum sativum	part of a conserved DNA module involved in light responsiveness
arahy.Tifrunner.gnm2.ann1.SS1VDK.1	AhTPP4	TCCC-motif	TCTCCCT	1724	7	+	Spinacia oleracea	part of a light responsive element
arahy.Tifrunner.gnm2.ann1.SS1VDK.1	AhTPP4	Box 4	ATTAAT	28	6	+	Petroselinum crispum	part of a conserved DNA module involved in light responsiveness
arahy.Tifrunner.gnm2.ann1.SS1VDK.1	AhTPP4	Box 4	ATTAAT	100	6	+	Petroselinum crispum	part of a conserved DNA module involved in light responsiveness
arahy.Tifrunner.gnm2.ann1.SS1VDK.1	AhTPP4	Box 4	ATTAAT	517	6	+	Petroselinum crispum	part of a conserved DNA module involved in light responsiveness
arahy.Tifrunner.gnm2.ann1.SS1VDK.1	AhTPP4	Box 4	ATTAAT	542	6	+	Petroselinum crispum	part of a conserved DNA module involved in light responsiveness
arahy.Tifrunner.gnm2.ann1.SS1VDK.1	AhTPP4	Box 4	ATTAAT	605	6	+	Petroselinum crispum	part of a conserved DNA module involved in light responsiveness
arahy.Tifrunner.gnm2.ann1.SS1VDK.1	AhTPP4	Box 4	ATTAAT	700	6	+	Petroselinum crispum	part of a conserved DNA module involved in light responsiveness
arahy.Tifrunner.gnm2.ann1.SS1VDK.1	AhTPP4	Box 4	ATTAAT	939	6	+	Petroselinum crispum	part of a conserved DNA module involved in light responsiveness
arahy.Tifrunner.gnm2.ann1.SS1VDK.1	AhTPP4	Box 4	ATTAAT	1306	6	-	Petroselinum crispum	part of a conserved DNA module involved in light responsiveness
arahy.Tifrunner.gnm2.ann1.SS1VDK.1	AhTPP4	Box 4	ATTAAT	1352	6	-	Petroselinum crispum	part of a conserved DNA module involved in light responsiveness
arahy.Tifrunner.gnm2.ann1.SS1VDK.1	AhTPP4	GA-motif	ATAGATAA	131	8	-	Arabidopsis thaliana	part of a light responsive element
arahy.Tifrunner.gnm2.ann1.SS1VDK.1	AhTPP4	GARE-motif	TCTGTTG	625	7	-	Brassica oleracea	gibberellin-responsive element
arahy.Tifrunner.gnm2.ann1.SS1VDK.1	AhTPP4	TCT-motif	TCTTAC	812	6	+	Arabidopsis thaliana	part of a light responsive element
arahy.Tifrunner.gnm2.ann1.SS1VDK.1	AhTPP4	ARE	AAACCA	1059	6	-	Zea mays	cis-acting regulatory element essential for the anaerobic induction
arahy.Tifrunner.gnm2.ann1.U769C2.1	AhTPP16	TGACG-motif	TGACG	337	5	+	Hordeum vulgare	cis-acting regulatory element involved in the MeJA-responsiveness
arahy.Tifrunner.gnm2.ann1.U769C2.1	AhTPP16	TGACG-motif	TGACG	516	5	-	Hordeum vulgare	cis-acting regulatory element involved in the MeJA-responsiveness
arahy.Tifrunner.gnm2.ann1.U769C2.1	AhTPP16	G-box	TACGTG	244	6	+	Arabidopsis thaliana	cis-acting regulatory element involved in light responsiveness
arahy.Tifrunner.gnm2.ann1.U769C2.1	AhTPP16	G-box	TACGTG	804	6	+	Arabidopsis thaliana	cis-acting regulatory element involved in light responsiveness
arahy.Tifrunner.gnm2.ann1.U769C2.1	AhTPP16	CGTCA-motif	CGTCA	337	5	-	Hordeum vulgare	cis-acting regulatory element involved in the MeJA-responsiveness
arahy.Tifrunner.gnm2.ann1.U769C2.1	AhTPP16	CGTCA-motif	CGTCA	516	5	+	Hordeum vulgare	cis-acting regulatory element involved in the MeJA-responsiveness
arahy.Tifrunner.gnm2.ann1.U769C2.1	AhTPP16	ABRE	ACGTG	245	5	+	Arabidopsis thaliana	cis-acting element involved in the abscisic acid responsiveness
arahy.Tifrunner.gnm2.ann1.U769C2.1	AhTPP16	ABRE	GCCGCGTGGC	528	9	+	Oryza sativa	cis-acting element involved in the abscisic acid responsiveness
arahy.Tifrunner.gnm2.ann1.U769C2.1	AhTPP16	ABRE	ACGTG	805	5	+	Arabidopsis thaliana	cis-acting element involved in the abscisic acid responsiveness
arahy.Tifrunner.gnm2.ann1.U769C2.1	AhTPP16	Gap-box	CAAATGAA(A/G)A	280	9.5	-	Arabidopsis thaliana	part of a light responsive element
arahy.Tifrunner.gnm2.ann1.U769C2.1	AhTPP16	GT1-motif	GGTTAA	1934	6	+	Arabidopsis thaliana	light responsive element
arahy.Tifrunner.gnm2.ann1.U769C2.1	AhTPP16	I-box	GATAAGGGT	1710	9	+	Arabidopsis thaliana	part of a light responsive element
arahy.Tifrunner.gnm2.ann1.U769C2.1	AhTPP16	CCAAT-box	CAACGG	559	6	-	Hordeum vulgare	MYBHv1 binding site
arahy.Tifrunner.gnm2.ann1.U769C2.1	AhTPP16	LAMP-element	CTTTATCA	1362	8	+	Pisum sativum	part of a light responsive element
arahy.Tifrunner.gnm2.ann1.U769C2.1	AhTPP16	LAMP-element	CTTTATCA	1385	8	+	Pisum sativum	part of a light responsive element
arahy.Tifrunner.gnm2.ann1.U769C2.1	AhTPP16	LAMP-element	CCTTATCCA	1708	9	-	Spinacia oleracea	part of a light responsive element
arahy.Tifrunner.gnm2.ann1.U769C2.1	AhTPP16	ATCT-motif	AATCTAATCC	907	9	-	Pisum sativum	part of a conserved DNA module involved in light responsiveness
arahy.Tifrunner.gnm2.ann1.U769C2.1	AhTPP16	GATA-motif	AAGGATAAGG	1707	9	+	Solanum tuberosum	part of a light responsive element
arahy.Tifrunner.gnm2.ann1.U769C2.1	AhTPP16	AT1-motif	AATTATTTTTTATT	1619	13	-	Solanum tuberosum	part of a light responsive module
arahy.Tifrunner.gnm2.ann1.U769C2.1	AhTPP16	AT1-motif	AATTATTTTTTATT	1637	13	-	Solanum tuberosum	part of a light responsive module
arahy.Tifrunner.gnm2.ann1.U769C2.1	AhTPP16	Box 4	ATTAAT	81	6	+	Petroselinum crispum	part of a conserved DNA module involved in light responsiveness
arahy.Tifrunner.gnm2.ann1.U769C2.1	AhTPP16	Box 4	ATTAAT	635	6	+	Petroselinum crispum	part of a conserved DNA module involved in light responsiveness
arahy.Tifrunner.gnm2.ann1.U769C2.1	AhTPP16	Box 4	ATTAAT	1275	6	-	Petroselinum crispum	part of a conserved DNA module involved in light responsiveness
arahy.Tifrunner.gnm2.ann1.U769C2.1	AhTPP16	Box 4	ATTAAT	1279	6	-	Petroselinum crispum	part of a conserved DNA module involved in light responsiveness
arahy.Tifrunner.gnm2.ann1.U769C2.1	AhTPP16	Box 4	ATTAAT	1437	6	-	Petroselinum crispum	part of a conserved DNA module involved in light responsiveness
arahy.Tifrunner.gnm2.ann1.U769C2.1	AhTPP16	Box 4	ATTAAT	1441	6	-	Petroselinum crispum	part of a conserved DNA module involved in light responsiveness
arahy.Tifrunner.gnm2.ann1.U769C2.1	AhTPP16	Box 4	ATTAAT	1654	6	-	Petroselinum crispum	part of a conserved DNA module involved in light responsiveness
arahy.Tifrunner.gnm2.ann1.U769C2.1	AhTPP16	Box 4	ATTAAT	1658	6	-	Petroselinum crispum	part of a conserved DNA module involved in light responsiveness
arahy.Tifrunner.gnm2.ann1.U769C2.1	AhTPP16	Box 4	ATTAAT	1961	6	-	Petroselinum crispum	part of a conserved DNA module involved in light responsiveness
arahy.Tifrunner.gnm2.ann1.U769C2.1	AhTPP16	TC-rich repeats	GTTTTCTTAC	852	9	+	Nicotiana tabacum	cis-acting element involved in defense and stress responsiveness
arahy.Tifrunner.gnm2.ann1.U769C2.1	AhTPP16	ARE	AAACCA	181	6	-	Zea mays	cis-acting regulatory element essential for the anaerobic induction
arahy.Tifrunner.gnm2.ann1.U769C2.1	AhTPP16	ARE	AAACCA	1431	6	-	Zea mays	cis-acting regulatory element essential for the anaerobic induction
arahy.Tifrunner.gnm2.ann1.U769C2.1	AhTPP16	ARE	AAACCA	1488	6	+	Zea mays	cis-acting regulatory element essential for the anaerobic induction
arahy.Tifrunner.gnm2.ann1.U769C2.1	AhTPP16	ARE	AAACCA	1725	6	-	Zea mays	cis-acting regulatory element essential for the anaerobic induction
arahy.Tifrunner.gnm2.ann1.U769C2.1	AhTPP16	ARE	AAACCA	1802	6	+	Zea mays	cis-acting regulatory element essential for the anaerobic induction
arahy.Tifrunner.gnm2.ann1.U769C2.1	AhTPP16	MRE	AACCTAA	392	7	+	Petroselinum crispum	MYB binding site involved in light responsiveness
arahy.Tifrunner.gnm2.ann1.U769C2.1	AhTPP16	MRE	AACCTAA	910	7	-	Petroselinum crispum	MYB binding site involved in light responsiveness

## Sheet: number
Table S Cis-regulatory elements number in the promoter region of peanut in this study.
Gene.ID	ABA responsiveness	MeJA responsiveness	GA responsiveness	IAA responsiveness	SA responsiveness	Light responsiveness	Anaerobic responsiveness	Defense and stress responsiveness	Anoxic specific responsiveness	Low- responsiveness	MYB elements
AhTPP1	1	0	1	1	0	7	3	0	0	0	2
AhTPP2	0	2	1	0	0	8	0	0	1	0	2
AhTPP3	1	0	1	0	1	9	1	0	0	0	0
AhTPP4	0	0	1	0	0	13	1	0	0	0	0
AhTPP5	1	2	1	1	1	8	1	0	0	0	3
AhTPP6	2	4	0	1	1	10	2	1	0	0	1
AhTPP7	2	4	2	1	0	18	0	0	0	1	2
AhTPP8	2	0	1	1	0	5	2	0	0	0	2
AhTPP9	2	0	2	0	0	14	2	1	0	1	6
AhTPP10	1	0	2	0	1	14	2	0	0	0	0
AhTPP11	2	0	0	1	0	8	2	0	0	0	1
AhTPP12	1	2	1	0	0	9	1	1	0	0	3
AhTPP13	0	2	2	1	3	11	4	1	1	4	0
AhTPP14	2	0	2	1	0	10	2	0	0	1	3
AhTPP15	0	2	2	0	0	19	5	0	0	1	1
AhTPP16	3	4	0	0	0	21	5	1	0	0	3
AhTPP17	1	6	0	1	0	10	1	0	0	1	1

## Sheet: Classification criteria
Table S Classification criteria for Cis-regulatory elements in promoters.
Founctions Group	hormone responsive	Founctions Group	stress responsive
MeJA-responsiveness	CGTCA-motif	Low-temperature responsiveness	LTR
	TGACG-motif	Defense and stress responsiveness	TC-rich repeats
Abscisic acid responsiveness	ABRE		G-box
Gibberellin-responsive element	GARE-motif		chs-CMA1a
	TATC-box		AE-box
	P-box		GT1-motif
Salicylic acid responsiveness	TCA-element		I-box
Auxin-responsive element	TGA-element		TCT-motif
	AuxRE	Light responsiveness	ATCT-motif
	AuxRR-core		Box 4
			TCCC-motif
			GATA-motif
			AT1-motif
			G-Box
			L-box
			AE-box
			ACE
			LAMP-element
			Gap-box
		Anaerobic responsiveness	ARE
		Anoxic specific responsiveness	GC-motif
			MRE
		MYB elements	CCAAT-box
			MBS
			MBSI
