# Supplementary figures and images for: Genome-wide identification of TPS and TPP genes in cultivated peanut (Arachis hypogaea) and functional characterization of AhTPS9 in response to cold stress
Source: Frontiers journal article supplement (doi:10.3389/fpls.2023.1343402), 2024-01-19

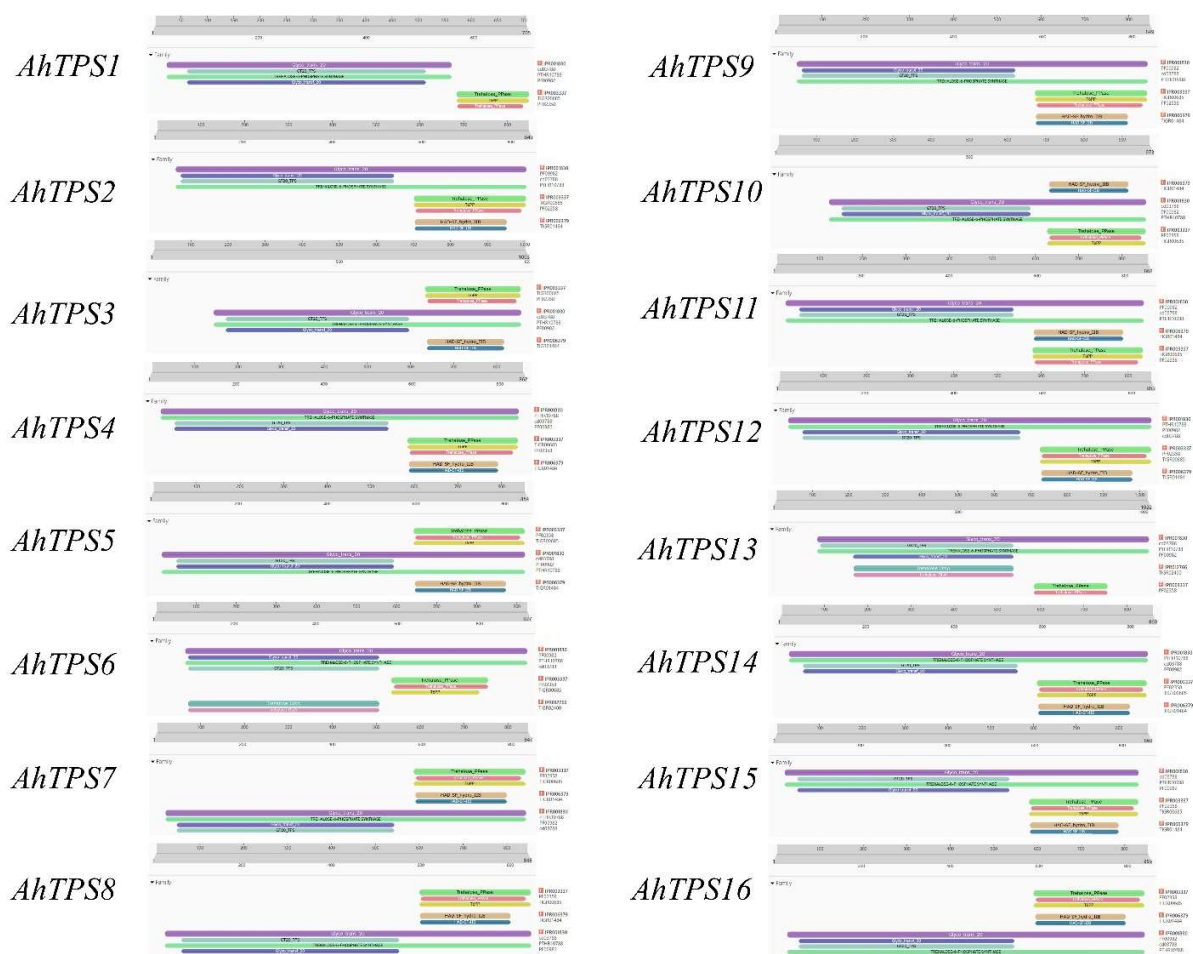

**Figure S1.** Conserved domains of *AhTPSs*.

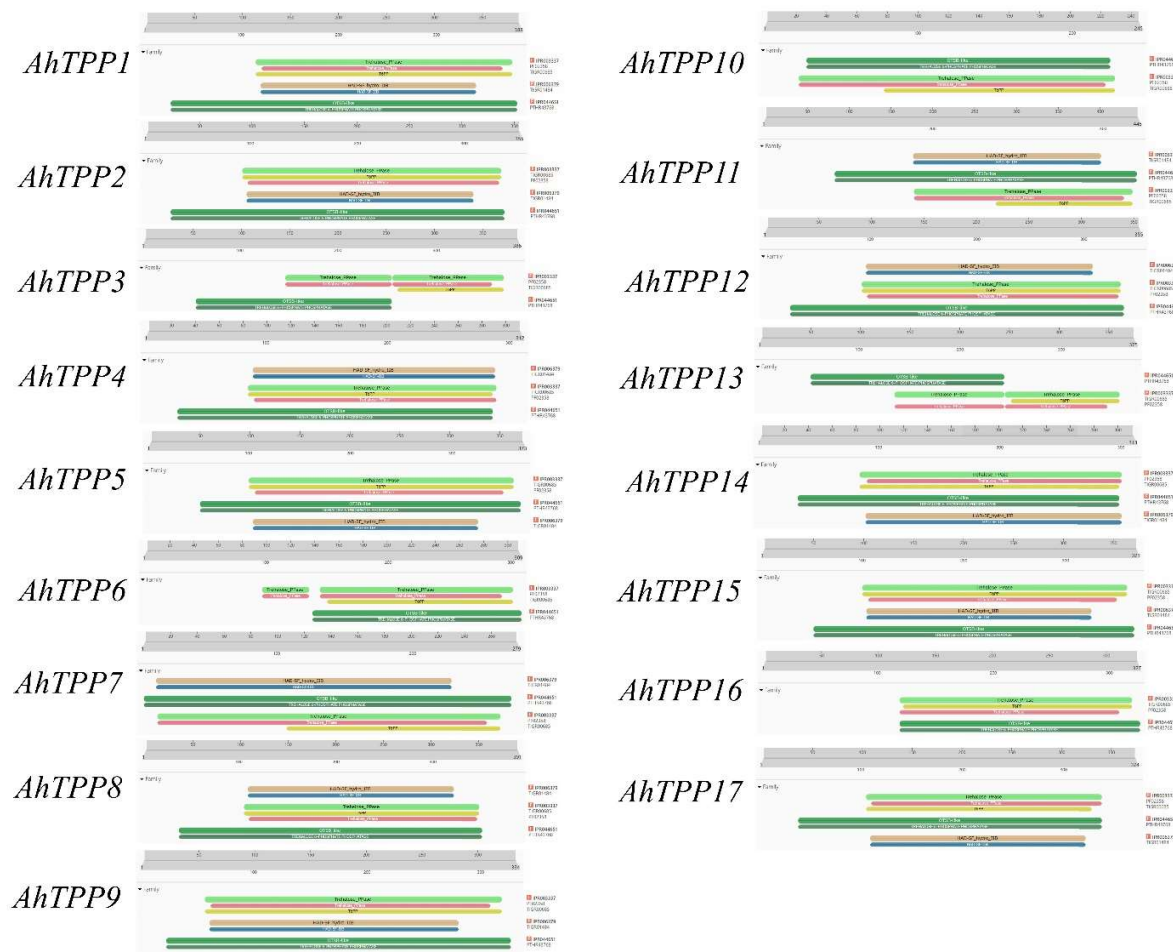

Figure S2. Conserved domains of AhTPPs.

Supplement: Data_Sheet_1.ZIP [file Data_Sheet_1.ZIP]
